# Supplementary material for: Klinische Notfallausbildung in der Pädiatrie
Source: Springer Nature journal article supplement (doi:10.1007/s00112-021-01250-5), 2021-07-29
Supplement: MOESM1 [file 19402564]

Zusatzmaterial zum Beitrag „Klinische Notfallausbildung in der Pädiatrie. Sachsenweite Umfrage unter WeiterbildungsassistentInnen“ von Markel F, Lück B, Dähnert I et al. (2021) in *Monatsschrift Kinderheilkunde*.

Beitrag und Zusatzmaterial stehen Ihnen auf [www.springermedizin.de](http://www.springermedizin.de) zur Verfügung. Bitte geben Sie dort den Beitragstitel in die Suche ein.

---

## Fragen der Online-Umfrage „Reanimation-Schockt dich das?“

- 1) Berufserfahrung in Monaten/Jahren (Pädiatrie/Neonatologie/Kreissaal/Anästhesie..)
- 2) Geschlecht?
  - Weiblich
  - Männlich
  - Divers/möchte ich nicht angeben
- 3) Derzeitiger Arbeitsort
  - Level1/2/3
  - Geburtsklinik (Versorgungsstufe 4)
  - Kinderklinik ohne Geburtsmedizin
  - Spezialisiertes Zentrum
  - Sonstiges
- 4) Gibt es an Ihrem derzeitigen Arbeitsort eine hausinterne Reanimations-Leitlinie (SOP, HA)?
  - Ja
  - Nein
  - Weiß ich nicht
- 5) Gibt es an Ihrem derzeitigen Arbeitsort eine organisierte Telefonkette (z.B. Rearuf) bei Notfällen/Reanimationen?
  - Ja
  - Nein
  - Weiß ich nicht
- 6) Höchstes Level an Reanimationstraining? (Mehrfachantworten möglich, erster Hilfe Kurs zählt nicht)
  - Kein Training
  - Beobachtung im klinischen Setting/Video
  - Theoretisches Training
  - Simulationstraining
  - Praktische Erfahrung am Patienten
- 7) Wie viele Notfallsituationen\*/klinische Reanimationen wurden in den letzten 12 Monaten erlebt als Teamleiter?  
\*Notfallsituation: unerwartetes lebensbedrohliches Ereignis, das ohne Reanimation abgewendet werden konnte
  - Keine
  - 1-2
  - 2-5

- 5-10
  - >10
- 8) Wie viele Notfallsituationen/klinische Reanimationen wurden in den letzten 12 Monaten erlebt als Teammitglied?
- Keine
  - 1-2
  - 2-5
  - 5-10
  - >10
- 9) Finden bei Ihnen regelmäßig Nachbesprechungen statt nach Reanimationen?
- Nie
  - Nur nach wenigen Ereignissen
  - Ja, nach den meisten Ereignissen
  - Nach allen Ereignissen
- 10) Finden bei Ihnen regelmäßig Nachbesprechungen statt nach Notfallsituationen?
- Nie
  - Nur nach wenigen Ereignissen
  - Ja, nach den meisten Ereignissen
  - Nach allen Ereignissen
- 11) Wie viele Simulationstrainings \* wurden in den letzten 12 Monaten erlebt?  
\* Simulationstraining: simulierte Notfallsituationen/Reanimationen am Modell im Unterschied zum Reatraining mit bloßem Erlernen von Skills (HDM, Masken-Beutel-Ventilation)
- Keins
  - 1-2
  - 2-5
  - 5-10
  - >10
- 12) Anzahl der Szenarien als Teamleiter?
- 13) Anzahl der Szenarien als Teammitglied?
- 14) Zu wie vielen Simulationstrainings (als Teamleiter) wurde ein Feedback durchgeführt in den letzten 12 Monaten?
- Zu keinem
  - Zu den wenigsten
  - Zu den meisten
  - Zu allen
- 15) Zu wie vielen Simulationstrainings (als Teammitglied) wurde ein Feedback durchgeführt in den letzten 12 Monaten?
- Zu keinem
  - Zu den wenigsten
  - Zu den meisten
  - Zu allen
- 16) Wie gut sind Sie für pädiatrische Notfälle/Reanimationen ausgebildet?
- Numerische Bewertung von 1-5 (1= sehr schlecht, 5=sehr gut)

- 17) Wie sicher fühlen Sie sich im Management von klinischen Notfällen/Reanimationen als Teamleiter?
- Numerische Bewertung von 1-5 (1= sehr schlecht, 5=sehr gut)
- 18) Wie sicher fühlen Sie sich im Management von klinischen Notfällen/Reanimationen als Teammitglied?
- Numerische Bewertung von 1-5 (1= sehr schlecht, 5=sehr gut)
- 19) Wie sicher fühlen Sie sich im Bereich der Masken-Beutel-Beatmung?
- Numerische Bewertung von 1-5 (1= sehr schlecht, 5=sehr gut)
- 20) Wie sicher fühlen Sie sich im Bereich der supraglottischen Atemwegssicherung (z.B. Larynxmaske, -tubus, pharyngealer (=Wendl) Tubus)?
- Numerische Bewertung von 1-5 (1= sehr schlecht, 5=sehr gut)
- 21) Wie sicher fühlen Sie sich im Bereich der Intubation?
- Numerische Bewertung von 1-5 (1= sehr schlecht, 5=sehr gut)
- 22) Wie sicher fühlen Sie sich im Legen eines intravenösen Zugangs?
- Numerische Bewertung von 1-5 (1= sehr schlecht, 5=sehr gut)
- 23) Wie sicher fühlen Sie sich im Legen eines intraossären Zugangs?
- Numerische Bewertung von 1-5 (1= sehr schlecht, 5=sehr gut)
- 24) Wie sicher fühlen Sie sich im Legen eines Nabelvenenkatheters?
- Numerische Bewertung von 1-5 (1= sehr schlecht, 5=sehr gut)
- 25) Wie sicher fühlen Sie sich in der Anordnung der Adrenalin-dosierung?
- Numerische Bewertung von 1-5 (1= sehr schlecht, 5=sehr gut)
- 26) Wie sicher fühlen Sie sich in der Durchführung der Herzdruckmassage?
- Numerische Bewertung von 1-5 (1= sehr schlecht, 5=sehr gut)
- 27) Wie sicher fühlen Sie sich in der Einhaltung des Reanimations-Algorithmus (Unterscheidung in defibrilierbarer/nicht defibrilierbarer Rhythmus, regelmäßige Rhythmuskontrollen, regelmäßige Adrenalingaben)?
- Numerische Bewertung von 1-5 (1= sehr schlecht, 5=sehr gut)
- 28) Wieviele Dienste arbeiten Sie außerhalb der Kernarbeitszeit pro Monat?
- Keine
  - 1-2
  - 2-5
  - 5-10
  - >10
- 29) Minimale Dauer bis zur Ankunft des Hintergrunddienstes auf der Station ab der telefonischen Information?
- Hintergrund im Haus, <2 Minuten
  - < 5 Minuten
  - 5-10 Minuten
  - 10-30 Minuten

- > 30 Minuten
- 30) Maximale Dauer bis zur Ankunft des Hintergrunddienstes auf der Station ab der telefonischen Information?
- Hintergrund im Haus, <2 Minuten
  - < 5 Minuten
  - 5-10 Minuten
  - 10-30 Minuten
  - > 30 Minuten
- 31) Wie gut empfanden Sie die Umsetzung folgender Punkte in Ihrem Team im letzten Notfall-/Reanimationsereignis?
- a) Kommunikation
  - b) Entscheidungsfindung
  - c) Situationswahrnehmung
  - d) Teamzusammenarbeit
- Numerische Bewertung von 1-5 (1= sehr schlecht, 5=sehr gut)
- 32) Wurde diese/s letzte Reanimation/Notfallereignis nachbesprochen?
- Ja
  - Nein
- 33) Wie viele der (bei der der Reanimation/ bei dem Notfall) Anwesenden haben an der Nachbesprechung teilgenommen?
- Alle
  - Die meisten
  - Die Hälfte
  - Wenige (oder ein kleiner Teil)
  - Niemand
- 34) Empfanden Sie die Nachbesprechung als hilfreich?
- Ja
  - Nein
- 35) Wurde darin besprochen, was zum Notfall/zur Reanimation geführt hat (= Situationsanalyse)?
- Ja
  - Nein
- 36) Wurde eine Fehleranalyse des Ereignisses durchgeführt?
- Ja
  - Nein
- 37) Konnte aus der Nachbesprechung eine Konsequenz abgeleitet werden (z.B. neue Handlungsempfehlung, mehr Personal/Training, ...)?
- ja
  - nein
- 38) Welches Training benötigen Sie in der Zukunft zum Management von klinischen Notfällen/Reanimationen als Teamleiter (Mehrfachnennungen möglich)?
- Keines
  - Mehr Beobachtung im klinischen Setting/Video

- Mehr theoretisches Training
- Mehr Simulationstraining
- Mehr praktische Erfahrung am Patienten

39) Welches Training benötigen Sie in der Zukunft zum Management von klinischen Notfällen/Reanimationen als Teammitglied (Mehrfachnennungen möglich)?

- Keines
- Mehr Beobachtung im klinischen Setting/Video
- Mehr theoretisches Training
- Mehr Simulationstraining
- Mehr praktische Erfahrung am Patienten
